# Supplementary material for: A unique transcriptomic landscape defines African-specific grade group 1 prostate cancer
Source: Research Square preprint supplement (doi:10.21203/rs.3.rs-9384143/v1), 2026-04-24
Supplement: Supplementary file 2 [file af7edbe3d0812c9c1f5c574a.pdf]

## Additional File 1: Supplementary Tables

### A unique transcriptomic landscape defines African-specific grade group 1 prostate cancer

Eva Ferlev Jensby, Korawich Uthayopas, Md Mehedi Hasan, Melanie Louw, Shingai B.A. Mutambirwa, Philip D. Stricker, Raymond A. Campbell, Philippe Lamy, Luigi Marchionni, Pan Prostate Cancer Group, Southern African Prostate Cancer Study, M.S. Riana Bornman, Anthony T. Papenfuss, Karina D. Sørensen & Vanessa M. Hayes

#### Supplementary Table S1: Participant clinicopathological characteristics post-filtering for this study (n=107).

<sup>a</sup>Country of origin. <sup>b</sup>Age at diagnosis. <sup>c</sup>PSA at diagnosis. PSA measurement unavailable for one African PCa and six European PCa patients. <sup>d</sup>Grade Group from diagnostic biopsies for African patients and radical prostatectomy for European patients. ASAP = atypical small acinar proliferation; BPH = benign prostatic hyperplasia; IQR = interquartile range; NA = not available; PCa = prostate cancer; PSA = prostate-specific antigen.

| Characteristic                                    | African             |                     | European            |
|---------------------------------------------------|---------------------|---------------------|---------------------|
|                                                   | Non-PCa<br>n = 26   | PCa<br>n = 34       | PCa<br>n = 47       |
| <b>Country<sup>a</sup>, n (%)</b>                 |                     |                     |                     |
| South Africa                                      | 26 (100)            | 34 (100)            | 0 (0)               |
| Australia                                         | 0 (0)               | 0 (0)               | 48 (100)            |
| <b>Age in years,<br/>median (IQR)<sup>b</sup></b> | 64.5<br>(58.2-66.8) | 64.0<br>(61.0-67.8) | 56.9<br>(53.0-61.3) |
| <b>PSA ng/mL,<br/>median (IQR)<sup>c</sup></b>    | 14.4<br>(7.6-18.8)  | 11.8<br>(8.0-36.6)  | 4.3<br>(3.4-5.7)    |
| <b>BPH, n (%)</b>                                 | 19 (73.1)           | 1 (2.9)             | NA                  |
| <b>Prostatitis, n (%)</b>                         | 13 (50)             | 8 (23.5)            | NA                  |
| <b>ASAP, n (%)</b>                                | 0 (0)               | 4 (11.8)            | NA                  |
| <b>Grade Group<sup>d</sup>,<br/>n (%)</b>         |                     |                     |                     |
| 1                                                 | NA                  | 30 (100)            | 47 (100)            |
| NA                                                | 26 (100)            | 0 (0)               | 0 (0)               |

**Supplementary Table S2: Clinical characteristics stratified by ancestry and PSA group (n = 107).** PSA measurements unavailable for one African and six European patients (assigned to PSA-unknown groups). ASAP = atypical small acinar proliferation; BPH = benign prostatic hyperplasia; IQR = interquartile range; NA = not available; PCa = prostate cancer; PSA = prostate-specific antigen.

| Characteristic                        | African             |                     |                      | European            |                     |                      |
|---------------------------------------|---------------------|---------------------|----------------------|---------------------|---------------------|----------------------|
|                                       | PSA-low<br>n = 30   | PSA-high<br>n = 29  | PSA-unknown<br>n = 1 | PSA-low<br>n = 21   | PSA-high<br>n = 20  | PSA-unknown<br>n = 6 |
| <b>Age in years,<br/>median (IQR)</b> | 63.0<br>(58.2-65.0) | 66.0<br>(61.0-72.0) | 80<br>(NA)           | 55.4<br>(51.2-57.6) | 58.2<br>(55.3-62.6) | 62.3<br>(54.6-68.3)  |
| <b>PSA ng/mL,<br/>median (IQR)</b>    | 7.8<br>(6.1-10.2)   | 25.7<br>(17.3-74.0) | NA                   | 3.4<br>(3.0-3.8)    | 5.9<br>(5.0-9.4)    | NA                   |
| <b>BPH,<br/>n (%)</b>                 | 9 (30.0)            | 11 (37.9)           | 0 (100)              | NA                  | NA                  | NA                   |
| <b>Prostatitis,<br/>n (%)</b>         | 9 (30.0)            | 11 (37.9)           | 1 (100)              | NA                  | NA                  | NA                   |
| <b>ASAP,<br/>n (%)</b>                | 3 (10.0)            | 1 (3.4)             | 0 (100)              | NA                  | NA                  | NA                   |
| <b>Grade Group,<br/>n (%)</b>         |                     |                     |                      |                     |                     |                      |
| 1                                     | 15 (50.0)           | 14 (48.3)           | 1 (100)              | 21 (100)            | 20 (100)            | 6 (100)              |
| NA                                    | 15 (50.0)           | 15 (51.7)           | 0 (0)                | 0 (0)               | 0 (0)               | 0 (0)                |

**Table S3: Top 20 leading-edge genes for key differentially enriched pathways between African (n = 34) and European (n = 47) prostate tumours.** Leading-edge genes represent the genes driving the enrichment signal and are ordered by their position in the ranked gene list. Pathways are ordered by adjusted *p*-value. NES = normalised enrichment score; padj = adjusted *p*-value.

| Leading Edge Genes (Top 20 per Pathway)                      |       |          |        |         |                                                              |         |         |         |         |                                                              |        |        |           |         |                                                         |          |          |          |        |
|--------------------------------------------------------------|-------|----------|--------|---------|--------------------------------------------------------------|---------|---------|---------|---------|--------------------------------------------------------------|--------|--------|-----------|---------|---------------------------------------------------------|----------|----------|----------|--------|
| <b>TNFA SIGNALING VIA NFKB</b><br>NES: -3.13   padj: 2.6e-35 |       |          |        |         | <b>OXIDATIVE PHOSPHORYLATION</b><br>NES: -2.67   padj: 3e-19 |         |         |         |         | <b>HYPOXIA</b><br>NES: -2.54   padj: 7.2e-16                 |        |        |           |         | <b>MTORC1 SIGNALING</b><br>NES: -2.14   padj: 6.5e-09   |          |          |          |        |
| FOSB                                                         | IL6   | FOS      | NR4A1  | ATF3    | PDK4                                                         | UQCRCQ  | ATP5ME  | NDUFA2  | NDUFS3  | IL6                                                          | FOS    | ATF3   | DUSP1     | CCN1    | SLC2A3                                                  | BTG2     | LDLR     | BHLHE40  | CXCR4  |
| DUSP1                                                        | SOCS3 | EGR1     | CCN1   | AREG    | ATP5MF                                                       | NDUFB6  | NDUFA1  | NDUFB1  | ATP5PD  | ZFP36                                                        | JUN    | SLC2A3 | CCN2      | ANGPTL4 | NAMPT                                                   | PPP1R15A | NFIL3    | RDH11    | PNP    |
| NR4A2                                                        | JUNB  | GADD45B  | ZFP36  | NR4A3   | NDUFB8                                                       | MRPL34  | NDUFS7  | PDHB    | NDUFC1  | SERPINE1                                                     | VEGFA  | TIPARP | PLAUR     | CCN5    | IDI1                                                    | DDIT4    | STC1     | SORD     | CDKN1A |
| EGR3                                                         | SIK1  | JUN      | SLC2A3 | CD69    | NDUFA9                                                       | NDUFB2  | COX8A   | ATP6V0B | MDH1    | BHLHE40                                                      | MAFF   | CXCR4  | KLF6      | IER3    | INSIG1                                                  | HMGCS1   | EBP      | HMGCR    | CD9    |
| <b>INFLAMMATORY RESPONSE</b><br>NES: -2.06   padj: 9.1e-08   |       |          |        |         | <b>FATTY ACID METABOLISM</b><br>NES: -2   padj: 2.9e-06      |         |         |         |         | <b>CHOLESTEROL HOMEOSTASIS</b><br>NES: -2.08   padj: 1.3e-05 |        |        |           |         | <b>GLYCOLYSIS</b><br>NES: -1.71   padj: 1.3e-04         |          |          |          |        |
| IL6                                                          | CSF3  | RGS1     | SELE   | CD69    | XIST                                                         | TDO2    | RDH11   | ACAT2   | IDI1    | ATF3                                                         | PLAUR  | LDLR   | AVPR1A    | NFIL3   | TFF3                                                    | ANGPTL4  | VEGFA    | CXCR4    | IER3   |
| RGS16                                                        | VIP   | SERPINE1 | HBEGF  | BTG2    | HMGCS1                                                       | CRYZ    | H2AZ1   | CBR1    | PDHB    | ERRF1                                                        | ACAT2  | IDI1   | HMGCS1    | EBP     | DDIT4                                                   | STC1     | BIK      | SDC2     | CLDN3  |
| PLAUR                                                        | OSM   | LDLR     | TNFSF9 | GPR183  | ALDH1A1                                                      | MDH1    | SERINC1 | MIF     | BLVRA   | HMGCR                                                        | CD9    | FDPS   | CYP51A1   | ANTXR2  | GPC3                                                    | GALK1    | FAM162A  | BPNT1    | MDH1   |
| IL1B                                                         | FPR1  | TNFAIP6  | KLF6   | NAMPT   | PTS                                                          | ACADL   | SUCLG1  | AOC3    | ACSL4   | SQLE                                                         | CTNNB1 | CLU    | STARD4    | SEMA3B  | SPAG4                                                   | KDELR3   | SOD1     | TGFBI    | MIF    |
| <b>COMPLEMENT</b><br>NES: -1.59   padj: 1.7e-03              |       |          |        |         | <b>IL2 STAT5 SIGNALING</b><br>NES: -1.57   padj: 2e-03       |         |         |         |         | <b>IL6 JAK STAT3 SIGNALING</b><br>NES: -1.66   padj: 4.8e-03 |        |        |           |         | <b>TGF BETA SIGNALING</b><br>NES: -1.59   padj: 1.7e-02 |          |          |          |        |
| IL6                                                          | MT3   | SERPINE1 | PLAUR  | MAFF    | GADD45B                                                      | SLC2A3  | RGS16   | GPR83   | RHOB    | IL6                                                          | SOCS3  | JUN    | CXCL3     | IL1B    | JUNB                                                    | THBS1    | SERPINE1 | PPP1R15A | KLF10  |
| DUSP5                                                        | ACTN2 | HSPA1A   | CDH13  | F3      | EMP1                                                         | BHLHE40 | MAFF    | IL1RL1  | KLF6    | CD38                                                         | IL2RA  | CD14   | MAP3K8    | PLA2G2A | ID2                                                     | CTNNB1   | CDKN1C   | ID3      | TGIF1  |
| LAMP2                                                        | OLR1  | C1QA     | CD55   | S100A13 | NFKBIZ                                                       | IL2RA   | NFIL3   | IL10    | PNP     | CD9                                                          | HMOX1  | IL7    | CRLF2     | IL17RB  | PPM1A                                                   | ID1      | RHOA     | WWTR1    | NOG    |
| DUSP6                                                        | CALM1 | TFP12    | CEBPB  | ANG     | MAP3K8                                                       | MYC     | PTRH2   | PHLDA1  | SMPDL3A | LEPR                                                         | PIM1   | IFNGR1 | TNFRSF12A | CD44    | TGFBR1                                                  |          |          |          |        |

**Supplementary Table S4: Top 25 significant DEGs in PSA-high Cluster 2 (n = 13) versus Cluster 1 (n = 16).** Clusters were identified by unsupervised clustering of cell type signature scores within PSA-high samples. Positive  $\log_2$  fold changes indicate higher expression in Cluster 2 relative to Cluster 1. Genes are ranked by adjusted  $p$ -value.

| Gene            | Log <sub>2</sub> Fold Change | Adjusted P-value       | P-value                |
|-----------------|------------------------------|------------------------|------------------------|
| SETP21          | 23.42                        | $7.00 \times 10^{-22}$ | $2.91 \times 10^{-26}$ |
| CASTOR3P        | -22.81                       | $1.89 \times 10^{-21}$ | $1.57 \times 10^{-25}$ |
| ENSG00000259623 | 26.09                        | $7.32 \times 10^{-21}$ | $9.13 \times 10^{-25}$ |
| ENSG00000256349 | -19.56                       | $1.26 \times 10^{-10}$ | $2.09 \times 10^{-14}$ |
| FAM117B         | 1.96                         | $1.27 \times 10^{-7}$  | $2.64 \times 10^{-11}$ |
| PCDHB2          | 4.16                         | $2.36 \times 10^{-7}$  | $5.88 \times 10^{-11}$ |
| PIK3CB          | 1.35                         | $1.69 \times 10^{-5}$  | $4.92 \times 10^{-9}$  |
| ENSG00000310519 | 3.51                         | $3.70 \times 10^{-5}$  | $1.23 \times 10^{-8}$  |
| DNAJA4          | 1.28                         | $7.74 \times 10^{-5}$  | $2.89 \times 10^{-8}$  |
| HBB             | 4.51                         | $1.25 \times 10^{-4}$  | $5.18 \times 10^{-8}$  |
| ENSG00000293025 | 3.88                         | $1.43 \times 10^{-4}$  | $6.54 \times 10^{-8}$  |
| ZNF613          | 2.09                         | $1.74 \times 10^{-4}$  | $8.68 \times 10^{-8}$  |
| FXYD6           | -1.93                        | $1.91 \times 10^{-4}$  | $1.03 \times 10^{-7}$  |
| TESK2           | 1.75                         | $2.19 \times 10^{-4}$  | $1.53 \times 10^{-7}$  |
| OPRK1           | 4.03                         | $2.19 \times 10^{-4}$  | $1.54 \times 10^{-7}$  |
| UNC13B          | 1.18                         | $2.19 \times 10^{-4}$  | $1.49 \times 10^{-7}$  |
| ENSG00000298932 | 4.59                         | $2.19 \times 10^{-4}$  | $1.47 \times 10^{-7}$  |
| ARHGAP6         | 0.96                         | $3.45 \times 10^{-4}$  | $2.58 \times 10^{-7}$  |
| TM6SF2          | -4.62                        | $3.46 \times 10^{-4}$  | $2.73 \times 10^{-7}$  |
| EXTL1           | -4.25                        | $3.47 \times 10^{-4}$  | $2.89 \times 10^{-7}$  |
| FAM135A         | 1.82                         | $3.67 \times 10^{-4}$  | $3.20 \times 10^{-7}$  |
| KRAS            | 1.07                         | $4.19 \times 10^{-4}$  | $3.83 \times 10^{-7}$  |
| CLMP            | -1.77                        | $4.28 \times 10^{-4}$  | $4.23 \times 10^{-7}$  |
| MALINC1         | 1.89                         | $4.28 \times 10^{-4}$  | $4.26 \times 10^{-7}$  |
| VSTM2L          | 2.36                         | $4.71 \times 10^{-4}$  | $5.23 \times 10^{-7}$  |
